# Supplementary material for: Cetuximab and Chemotherapy as Initial Treatment for Metastatic Colorectal Cancer
Source: Atypon-hosted journal article supplement (doi:10.1056/nejmoa0805019), 2009-04-01
Supplement: nejm_van_cutsem_1408sa1.pdf [file nejm_van_cutsem_1408sa1.pdf]

## Supplementary Appendix

This appendix has been provided by the authors to give readers additional information about their work.

Supplement to: Van Cutsem E, Köhne C-H, Hitre E, et al. Cetuximab and chemotherapy as initial treatment for metastatic colorectal cancer. *N Engl J Med* 2009;360:1408-17.

### Supplementary Figure 1. Study Design

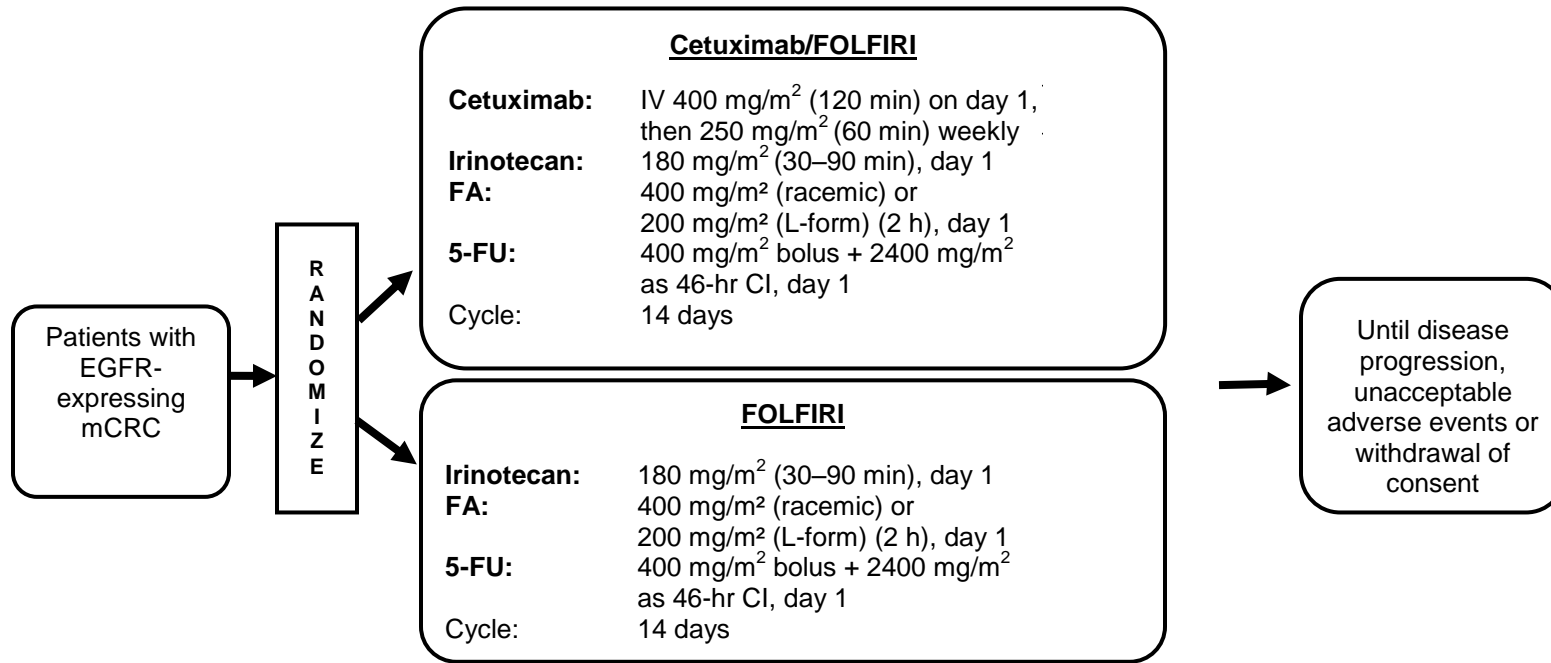

EGFR denotes epidermal growth factor receptor, FA folinic acid, 5-FU 5-fluorouracil, CI continuous infusion, mCRC metastatic colorectal cancer and PD progressive disease.

## Supplementary Figure 2. Number of Screened Patients at Each Stage of the Trial

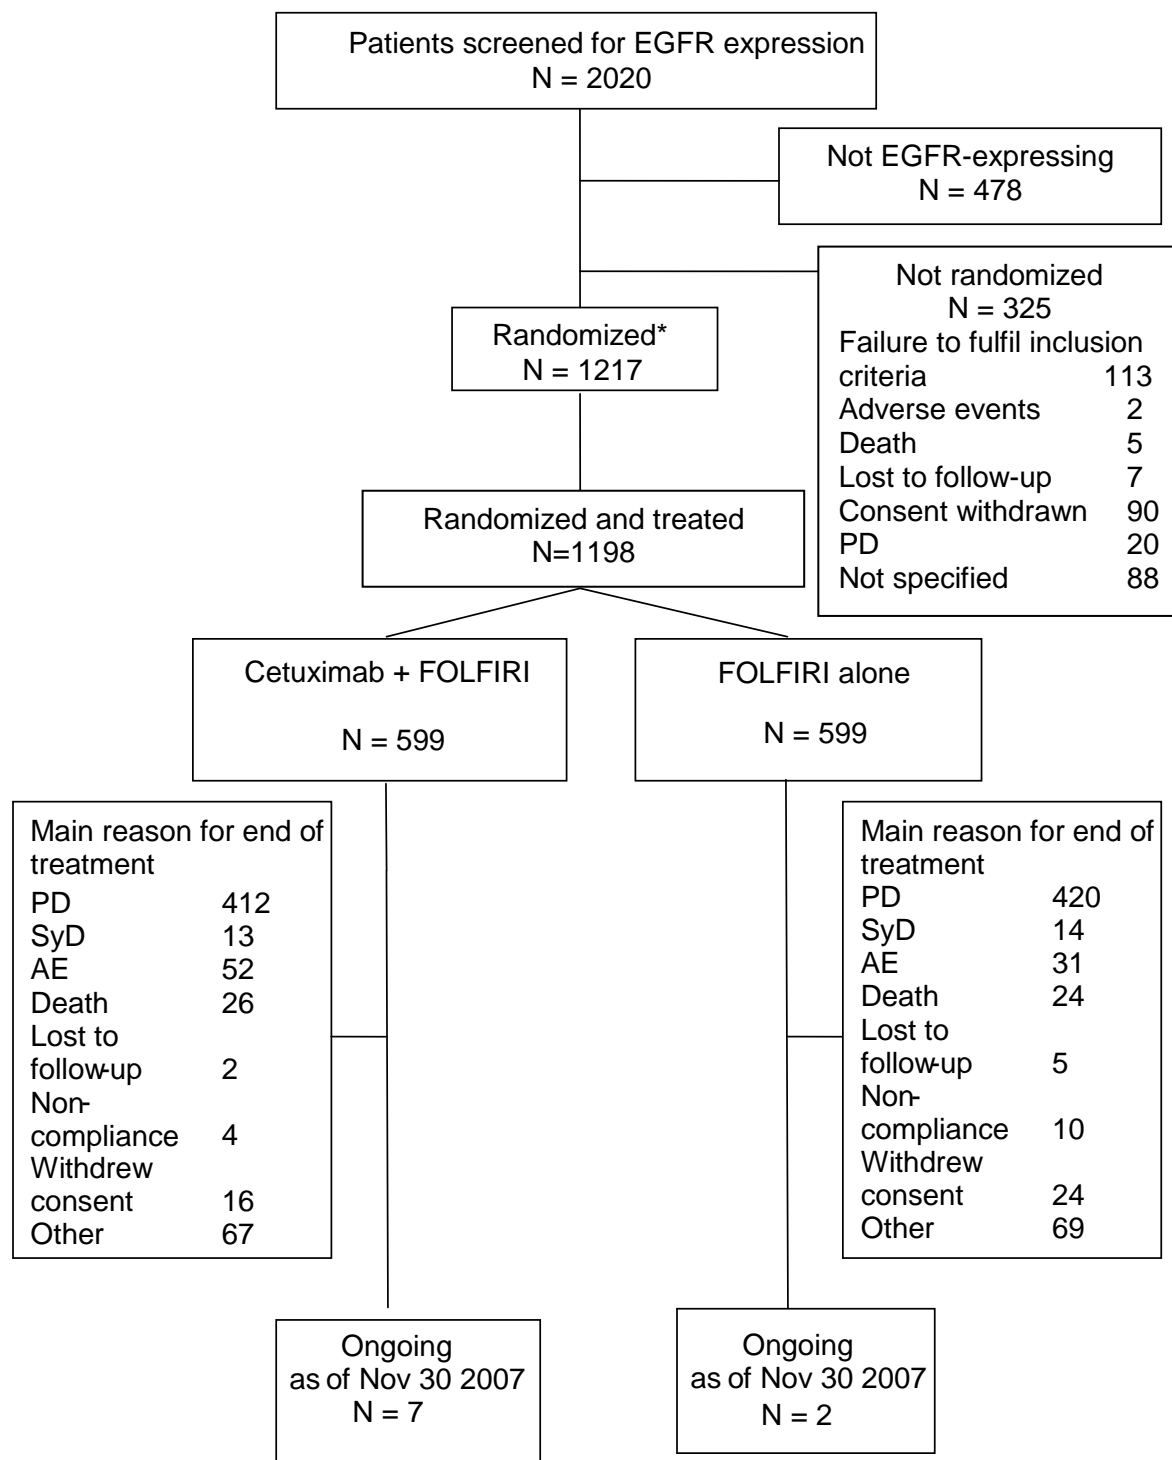

\*Safety population (N = 1221) includes 4 patients (2 in each arm) who were treated but not randomized. 19 randomized patients did not undergo treatment: this is common in oncology trials and in this case, while reasons were not specified, it was probably due mainly to intercurrent disease and withdrawal of consent. ITT denotes intention-to-treat, PD progressive disease, SyD symptomatic deterioration (non-imaging proven PD) and AE adverse event.

**Supplementary Table 1. Most Common Grade 3 or 4 Adverse Events and Special Adverse Event Categories Shown in Table 3, Presented According to Tumor *KRAS* Mutation Status**

| MedDRA Preferred term                                          | Patients (%)               |                                  |                           |                                  |
|----------------------------------------------------------------|----------------------------|----------------------------------|---------------------------|----------------------------------|
|                                                                | <i>KRAS</i> wild type      |                                  | <i>KRAS</i> mutations     |                                  |
|                                                                | FOLFIRI alone<br>(N = 176) | Cetuximab + FOLFIRI<br>(N = 173) | FOLFIRI alone<br>(N = 87) | Cetuximab + FOLFIRI<br>(N = 105) |
| Any                                                            | 93 (52.8)                  | 139 (80.3)                       | 48 (55.2)                 | 77 (73.3)                        |
| Neutropenia                                                    | 34 (19.3)                  | 50 (28.9)                        | 20 (23.0)                 | 23 (21.9)                        |
| Leukopenia                                                     | 8 (4.5)                    | 12 (6.9)                         | 5 (5.7)                   | 7 (6.7)                          |
| Diarrhea                                                       | 16 (9.1)                   | 32 (18.5)                        | 11 (12.6)                 | 14 (13.3)                        |
| Fatigue                                                        | 9 ( 5.1)                   | 5 ( 2.9)                         | 2 (2.3)                   | 10 (9.5)                         |
| Rash                                                           | 0 (0)                      | 13 ( 7.5)                        | 0 (0)                     | 7 (6.7)                          |
| Dermatitis acneiform                                           | 0 (0)                      | 10 ( 5.8)                        | 0 (0)                     | 8 (7.6)                          |
| Vomiting                                                       | 5 (2.8)                    | 8 ( 4.6)                         | 6 (6.9)                   | 3 (2.9)                          |
| <b>Special adverse event categories (all treated patients)</b> |                            |                                  |                           |                                  |
| Acne-like rash*                                                | 0 (0)                      | 29 (16.8)                        | 0 (0)                     | 19 (18.1)                        |
| All skin reactions*                                            | 0 (0)                      | 41 (23.7)                        | 0 (0)                     | 21 (20.0)                        |
| Infusion-related reactions                                     | 0 (0)                      | 4 ( 2.3)                         | 0(0)                      | 4 (3.8)                          |

\*No grade 4 skin reactions or acne-like rash were reported.

## SUPPLEMENTARY METHODS

### KRAS mutation analysis

#### *Pathology*

Formaldehyde-fixed, paraffin-embedded (FFPE) tumor biopsy samples were sent to a central facility (Merck Serono, Darmstadt) for *KRAS* mutation analysis, either as paraffin blocks or as 3-5  $\mu\text{m}$  paraffin sections mounted on glass slides. Serial sections were cut for pathological analysis (3  $\mu\text{m}$ ) and DNA extraction (10  $\mu\text{m}$ , stored at  $-80\text{ }^{\circ}\text{C}$  pending isolation). A pathologist confirmed the presence of invasive tumor cells in the tissue through examination of hematoxylin and eosin (HE)-stained sections. If invasive tumor cells could not be confirmed in a particular sample, the biopsy was excluded from further analysis.

#### *DNA extraction*

If tumor samples were available only as sections mounted on glass slides, the complete sample was scraped off, using a fresh scalpel for each slide, and transferred into a 1.5 ml tube. For FFPE tissue, DNA was generally extracted from 10  $\mu\text{m}$  sections (3-10 depending on biopsy size). If samples were  $<2\text{ mm}$  in diameter, punches of 1.3 mm diameter were taken with a biopsy needle from the paraffin block and transferred into 1.5 ml tubes for extraction.

Paraffin was dissolved by adding 800  $\mu\text{l}$  xylene to each sample followed by gentle mixing. Then 400  $\mu\text{l}$  ethanol (100% v/v) was added and the mixture centrifuged for 2 minutes at 13000 revolutions per minute (rpm) in a microcentrifuge. The supernatant was carefully removed. If any remaining paraffin was visible, the xylene and ethanol extraction was repeated. The pellet was washed with 1000  $\mu\text{l}$  of ethanol (100% v/v), the tubes centrifuged for 2 minutes at 13000 rpm, the supernatant carefully removed and the pellet dried for 10 minutes at  $55\text{ }^{\circ}\text{C}$ . Genomic DNA was isolated from the dried pellet using the DNeasy Blood & Tissue Kit (Qiagen, Hilden, Germany) according to the manufacturer's instructions. The concentration of each isolated DNA was determined by measuring the absorption at 260 nm using a Nanodrop UV/VIS spectrometer. Purity was assessed by determination of the 260/280 nm ratio. The DNA quality was further assessed in a *KRAS*-independent quantitative polymerase chain reaction (qPCR)

amplification. Genomic DNA from cell lines was also isolated using the DNeasy Blood & Tissue Kit, according to the manufacturer's instructions and quantified and quality controlled as for the FFPE material.

### ***KRAS mutation detection by locked nucleic acid (LNA)-mediated qPCR clamping and melting curve analysis***

#### ***LNA-mediated qPCR clamping***

PCR reactions were performed on a LightCycler<sup>®</sup> 2.0 system using a *KRAS* mutation detection specific program with additional melting curve analysis in a one-step qPCR amplification and detection run using the LightMix k-ras Gly12 assay (TIB MOLBIOL, Berlin, Germany). The methodology is adapted from Chen et al, 2004.<sup>1</sup> The *KRAS* mutation specific primer pair (*KRAS* forward, *KRAS* reverse) amplified a genomic fragment from *KRAS* exon 2. Hybridization probes were designed to be complementary to specific *KRAS* codon 12 sequences. The anchor probe (Anchor FL) was 3'-end labeled with fluorescein, and the sensor probes were 5'-end labeled with LC Red dye and 3'-end phosphorylated to prevent extension. The two different sensor probes covered the mutation hotspot region. Amplification of *KRAS* wild-type DNA was inhibited by temperature stable binding of the *KRAS* wild-type specific LNA (2'-4' bridged ribose backbone) probe.

The mutation analysis was performed in duplicate for each tumor sample. A PCR master-mix was prepared in a cooled reaction tube containing: 7.4 µl PCR-grade water, 1.6 µl 25 mM MgCl<sub>2</sub>, 4.0 µl of reagent/primer mix (parameter specific reagents containing both PCR primers, one anchor, two sensor-probes and the LNA), 2.0 µl of qPCR Mastermix (Roche Diagnostics, Penzberg, Germany). The reaction mix (15 µl) was pipetted into a LightCycler capillary and 5 µl of the genomic DNA solution (50 ng) was added to yield a final reaction volume of 20 µl. PCR reactions incorporating 1 ng of DNA derived from cell lines with defined *KRAS* mutations and 1 or 10 ng of DNA from cell lines or cells with wild-type DNA were included as controls in each run. Also, a reagent and device control and a water only control to check for cross contamination were included in each reaction run. The qPCR conditions comprised a pre-cycling incubation of 600 seconds at 95 °C followed by 45 cycles of 95 °C for 10 seconds; 58 °C for 5 seconds and 72 °C for 12 seconds.

### ***Melting curve analysis***

After the qPCR run, a melting curve analysis was performed by measuring the fluorescence of the samples with increasing temperature. Initially, the PCR products were denatured at 95°C. Subsequent cooling allowed the anchor-probe and the mutation-specific sensor probes to anneal resulting in increased fluorescence due to fluorescence resonance energy transfer (FRET) between anchor and sensor probe dyes. The melting curve was assessed by heating from 40 °C to 85 °C, with continuous monitoring of fluorescence in the 640 nm/530 nm channel. At a certain temperature, depending on the identity of the *KRAS* mutation, binding of the sensor probes to the DNA strand is disrupted. This results in spatial separation of the FRET partners and as a consequence, in a drop of fluorescence. The change of fluorescence intensity was converted to a melting peak ( $T_m$ ) by plotting the negative derivative of fluorescent signal corresponding to the temperature ( $-dF/dT$ ). The melting curve analysis program therefore comprised a pre-incubation of 20 seconds at 95 °C followed by 20 seconds at 58 °C followed by 10 seconds at 40 °C followed by heating to 85 °C at 0.3 °C/second.

Different individual *KRAS* mutations displayed different characteristic  $T_m$ s and could be identified by comparing the  $T_m$  of each sample with the  $T_m$  of respective positive control. Prior to assessment of the *KRAS* mutation status in patient samples the method and sensitivity were validated using already characterized cell lines with defined *KRAS* mutations (data available on request). All relevant codon 12/13 *KRAS* mutations previously described as occurring in colorectal tumors could be detected, including nucleotide: 34 G>A (G12S), 34 G>T (G12C), 35 G>A (G12D), 35 G>T (G12V), 35 G>C (G12A), 38 G>A (G13D). Additionally, a seventh mutation rarely occurring in CRC could also be detected: 34 G>C (G12R). Furthermore, the ability of the LNA-mediated qPCR clamping method to detect *KRAS* mutations in an excess of wild-type DNA was confirmed using a dilution series (up to 500-fold excess of *KRAS* wild-type DNA) of DNA derived from SW480 cells (*KRAS* G12V) with HT29 cells (wild-type *KRAS*) and on clinical FFPE CRC biopsies with a small proportion of tumor cells (tumor cell content < 5% as determined by a pathologist).

The validation of the method included testing against specific cell lines with defined *KRAS* mutations, determination of the sensitivity in dilution series of mutated and wild

type DNAs as well as comparative analysis, using an alternative technique (DxS *K-RAS* Mutation Detection Kit, DxS Ltd, Manchester, UK), of the *KRAS* mutation status in 43 paraffin-embedded formalin-fixed colorectal cancer tissue samples from a pilot study for *KRAS* testing.

1. Chen CY, Shiesh SC, Wu SJ. Rapid detection of K-ras mutations in bile by peptide nucleic acid-mediated PCR clamping and melting curve analysis: comparison with restriction fragment length polymorphism analysis. *Clin Chem* 2004;50:481-9.

## Appendix

The following investigators from 189 centres in the listed countries screened patients for enrolment in the CRYSTAL trial: *Argentina*, M. Chacon (Instituto Alexander Fleming, Buenos Aires), M.G. Pallotta (Hospital Italiano de Buenos Aires, Buenos Aires), E. Roca (Hospital de Gastroenterología Dr. Carlos Bonorino Udaondo, Buenos Aires), C. Silva (Hospital Británico, Buenos Aires); *Australia*, J. Dickson and C. Karapetis (Flinders Medical Centre, Bedford Park), T. Price (The Queen Elizabeth Hospital, Woodville), N. Tebbutt (Austin Hospital, Heidelberg), G. van Hazel (Mount Medical Centre, West Perth and Sir Charles Gairnder Hospital, Nedlands), R. Ward (St Vincent's Hospital, Darlinghurst); *Austria*, P. Balcke (Allgemeines Krankenhaus St. Pölten, St. Pölten), C. Dittrich (Ludwig-Boltzmann-Institute for Applied Cancer Research, Wien), W. Eisterer and E. Wöll (Univ.-Klinik f. Inn. Medizin, Innsbruck), K. Gattringer (A.ö. Bezirkskrankenhaus Kufstein, Kufstein), R. Greil (St. Johannis Spital-und Landkrankenhaus, Salzburg), P. Kier (Donauspital im SMZ-Ost der Stadt Wien, Wien), H.J Neumann (A.ö. Krankenhaus d. barmherzigen Brüder, St. Veit a.d. Glan), J. Thaler (Klinikum Kreuzschwestern Wels GmbH, Wels); *Belgium*, G. D'Haens (Imelda Ziekenhuis, Bonheiden), C. Focan (Cliniques Saint Joseph, Liège), B. Neyns (AZ VUB Dienst, Jette), M. Peeters (University Hospital Gent, Gent), M. Rasschaert (St. Vincentius Hospital, Antwerpen), E. Van Cutsem (University Hospital Gasthuisberg, Leuven), J.-L. Van Laethem (Erasme Hospital, Bruxelles), J. Van Ongeval (AZ Sint-Lucas, Gent), J.B. Vermorken (University Hospital Antwerp, Edegem); *Brazil*, C. Cabral (Associação de Combate ao Câncer em Goiás, Goiânia), A. Cosme de Oliveira (HCFMUSP, São Paulo), A. del Giglio (Faculdade de Medicina do ABC, Santo André), J. Fleck (Irmandade Santa Casa de Misericórdia de Porto Alegre, Porto Alegre); *Bulgaria*, N. Ivanova (Multiprofile Hospital for Active Treatment, Pleven), G. Kurteva (Specialized Hospital for Active Treatment in Oncology, Sofia), A. Tomova (District Dispensary for

Oncological Diseases, Plovdiv), C. Tsekov (Multiprofile Hospital for Active Treatment "Sveta Marina", Varna); *Chile*, F.J. Orlandi (Clínica Santa María, Santiago de Chile, Región Metropolitana), J.M. Reyes (Clínica Las Condes, Santiago de Chile, Región Metropolitana); *Czech Republic*, J. Abrahamova (Onkologicke odd. FTN, Praha 4), M. Kuta (Onkologicke centrum Nemocnice Chomutov, Chomutov), L. Petruzelka (Onkologicka klinika VFN, Praha 2), J. Prausova (Radioterapeuticko-onkologicke oddeleni, Fakultni nemocnice v Motole, V uvalu 84, Prague 5); *Finland*, S. Pyrhönen (Turku University Hospital, Turku); *France*, C. Borel (Centre Paul Strauss, Strasbourg), J. Egreteau (Centre Hospitalier de Bretagne Sud, Lorient), R. Faroux (Hôpital Les Oudairies, La Roche Sur Yon), F. Hussein (Hôpitaux Civils de Colmar, Colmar), C.-B. Levaché (Polyclinique Francheville, Perigueux), L. Miglianico (CMC Saint Vincent-Oncologie-Radiothérapie, Saint Gregoire), J.-F. Ramee (Centre Catherine de Sienne, Nantes CEDEX 2), J.-L. Raoul (Centre Eugène Marquis, Rennes Cedex), C. Rebischung (CHU Grenoble, Grenoble Cedex 9), P. Rougier (Hôpital Ambroise Paré, Boulogne), J.F. Seitz (Unité d'Hépatogastro-Entérologie et d'Oncologie Digestive, Marseille Cedex 5), D. Smith (Hôpital Saint André, Bordeaux Cedex), F. Viret (Institut Paoli Calmettes, Marseille); *Germany*, A. Erhardt (Heinrich-Heine-Universitätsklinik Düsseldorf, Düsseldorf), G. Folprecht (Universitätsklinikum "Carl Gustav Carus," Dresden), M. Heike (Medizinische Klinik Mitte, Dortmund), T. Herrmann (Med. Universitätsklinik Heidelberg, Heidelberg), K. Höffken (Klinikum der Friedrich-Schiller-Universität Jena, Jena), E. Jäger (Krankenhaus Nordwest, Frankfurt am Main), S. Kanzler and M.H. Möhler (Johannes-Gutenberg-Universitätsklinikum, Mainz), C-H. Köhne (Klinikum Oldenburg GmbH, Oldenburg), F. Otto and M. Trepel (Universitätsklinikum Freiburg, Freiburg), C. Peschel (Klinikum rechts der Isar, München), M. Pfreundschuh (Universitätskliniken des Saarlandes, Homburg/Saar), G. Ramadori (Universitätsklinik Göttingen, Göttingen), J. Rudi (Theresienkrankenhaus und St.Hedwig-Klinik GmbH, Mannheim), H.J. Schmoll

(Martin-Luther-Universität Halle-Wittenberg, Halle), T. Seufferlein (Universitätsklinikum Ulm, Ulm), H. Wilke (Kliniken Essen-Mitte Huysens Stift, Essen); *Greece*, V. Georgoulas (University General Hospital of Heraklion, Voutes, Heraklion), S. Kakolyris (University General Hospital of Alexandroupolis, Alexandroupolis), G. Panagos (Agioi Anargyroi Cancer Hospital, Athens); *Hong Kong*, A. Chan (Prince of Wales Hospital, Shatin), R. Chan and R. Liu (Queen Mary Hospital, Hong Kong); *Hungary*, G. Bodoky (St László Hospital, Budapest), E. Hitre (Országos Onkológiai Intézet, Budapest), L. Landherr (Fővárosi Önkormányzat Uzsoki utcai Kórháza, Budapest), T. Pintér (Petz Aladár County Teaching Hospital, Győr), J. Szántó (Debreceni Egyetem Orvos- és Egészségtudományi Centrum, ÁOK Onkológiai Tanszék, Debrecen), M. Szucs (Bács-Kiskun Megyei Önkormányzat Kórháza, Kecskemét); *Italy*, E. Aitini (Azienda Ospedaliera C. Poma, Mantova), C. Barone (Università Cattolica Sacro Cuore Policlinico Gemelli, Roma), A.R. Bianco and G. Tortora (Università Federico II, Napoli), C. Boni (Azienda Ospedaliera S.Maria Nuova, Reggio Emilia), S. Cascinu (Clinica di Oncologia Medica-Università degli Studi di Ancona, Ancona), F. Ciardiello (II Università degli Studi, Napoli), G. Colucci (IRCCS Istituto Oncologico di Bari, Bari), P. Conte (Azienda ospedaliera Policlinico di Modena, Modena), B. Daniele (Azienda Ospedaliera G. Rummo, Benevento), F. Di Costanzo (Ospedale Careggi, Firenze), G. Farina and A. Scanni (Azienda Ospedaliera Fatebenefratelli e Oftalmico, Milano), S. Frustaci (IRCCS Centro di Riferimento Oncologico, Aviano), G. Gasparini (Ospedale S. Filippo Neri, Roma), A. Santoro (Istituto Clinico Humanitas, Rozzano), S. Siena (Ospedale Niguarda Cà Grande, Milano); *Republic of Korea*, H.M. Chang and T.W. Kim (Asan Medical Center, Seoul), J Kyung Roh (Yonsei University College of Medicine, Seoul), O.P. Joon and Y.S. Park (Samsung Medical Center, Seoul), J.S. Kim (Guro Hospital, Seoul); *Lithuania*, B. Aleknaviciene (Vilniaus Universiteto Onkologijos Institutas, Vilnius), A. Cesas (Klaipėdos Ligonine, Klaipėda), R. Janciauskiene (Kauno Medicinos Universiteto

Klinikos, Kaunas); *Netherlands*, D.J. De Gooyer (Ziekenhuis Franciscus, Roosendaal), J.C. Graaf (Isala klinieken, Sophia and Weezenlanden sites, Zwolle), H.P. Sleeboom (HagaZiekenhuis, Den Haag), J.M. Smit (Gelre Ziekenhuis, Apeldoorn), A.J. ten Tije (Ziekenhuis Gooi-Noord, Blaricum), C.J. van Groeningen (VU Medisch Centrum, Amsterdam); *Poland*, K. Drosik (Wojewódzki Ośrodek Onkologii SPZOZ, Opole), E. Filipczyk-Cisarz (Dolnośląskie Centrum Onkologii, Wrocław), M. Nowacki (Centrum - Instytut Onkologii, Warszawa), E. Nowara (Centrum - Instytut Onkologii, Gliwice), J. Rolski and M. Pawlicki (Centrum Onkologii, Krakow), C. Szczylik (Wojskowy Instytut Medyczny, Warszawa), M. Wojtukiewicz (Białostocki Ośrodek Onkologiczny, Białystok), J. Zaluski (Wielkopolskie Centrum Onkologii, Poznan); *Portugal*, J. Marques (Hospital de Santo António dos Capuchos, Lisboa), A. Sá (Hospitais da Universidade de Coimbra, Coimbra); *Romania*, C. Cebotaru (Institutul Oncologic "Ion Chiricuta", Cluj Napoca), E. Ganea Motan (Spitalul Judetean de Urgenta "Sf. Ioan cel Nou", Suceava), C. Volovat (Centrul de Oncologie Medicala, Iasi); *Russian Federation*, M. Biakhov (Semashko Central Clinical Hospital, Moscow), S. Cheporov (Yaroslavl Regional Oncology Dispansary, Yaroslavl), V. Gorbunova (NN Blokhin Russian Cancer Research Center of RAMN, Moscow), A. Makhson (Moscow Municipal City Hospital #62, Moscow area), G. Manikhas (City Clinical Oncology Hospital, Saint Petersburg), V. Moiseyenko (NN Petrov Research Institute of Oncology, Saint Petersburg); *Singapore*, R. Lim (National University Hospital, Singapore), S. Ong (National Cancer Centre, Singapore); *Slovakia*, R. Hruby (Onkologicko-radioterapeutické oddelenie, Zilina), L. Jurga (Fakultna nemocnica Trnava, Trnava), S. Spanik (Onkologický ústav sv. Alžbety, Bratislava), J. Sufliarsky (Narodný onkologický ústav, Bratislava), M. Wagnerova (Vychodoslovenský onkologický ústav, Košice); *South Africa*, P. Barnardt (Tygerberg Hospital, Cape Town), L. Dreosti, C. Slabber and A. Vorster (Pretoria Academic Hospital, Pretoria), D. Hacking and A. McCleave (Durban Oncology Centre, Durban), J.R. Malan (Eastern Cape

Oncology Centre, Port Elizabeth), B. Rapoport (The Medical Oncology Centre of Rosebank, Johannesburg), P. Ruff (University of Witwatersrand, Johannesburg); *Spain*, J.-M. Campos (Campos-Hospital Arnau de Vilanova, Valencia), C. Fernandez-Martos (IVO, Valencia), P. Garcia Alfonso (Hospital Universitario Gregorio Marañón, Madrid), R. Garcia-Carbonero (Garcia-Carbonero-Hospital Severo Ochoa, Leganes), M<sup>a</sup>J. Gomez-Reina (Hospital Puerta del Mar, Cadiz), C. Gravalos (Hospital Doce de Octubre, Madrid), E. Jimenez (Hospital General de Jerez, Jerez de la Frontera), A. Leon (Fundacion Jimenez Diaz, Madrid), F. Losa (Hospital General de Hospitalet, Barcelona), H. Manzano (Hospital Son Dureta, Palma de Mallorca), J. Maurel (Hospital Clinic i Provincial de Barcelona, Barcelona), M<sup>a</sup>J. Safont (Safont-Hospital General Universitario de Valencia, Valencia), J. Sastre (Hospital Clínico San Carlos, Madrid), M. Valladares (Complejo Hospitalario Juan Canalejo, A Coruña); *Sweden*, B. Gustavsson (Sahlgrenska Universitetssjukhuset Östra, Göteborg); *Taiwan*, C.-S. Chang (Changhua Christmas Hospital, Changhua), Chung-Rong C.C. (Chang Gung Memorial Hospital, Chang Gung University, Taoyuan), P.-M. Chen and J. Whang-Peng (National Health Research Institute, Taipei), A.-L. Cheng (National Taiwan University Hospital, Taipei), K.-D. Lee (Chang Gung Memorial Hospital-Chia Yi, Chiayi), M.-C. Liu (Koo Foundation Sun Yet-Sen Cancer Center, Taipei); *Turkey*, F. Aykan (Istanbul University Hospital, Istanbul), N.M. Mandel (Cerrahpasa University Hospital, Istanbul), U.A. Sanli (Tulay Aktas Oncology Hospital Bornova, Izmir), S. Yalcin (Hacettepe University Hospital, Ankara); *Ukraine*, L. Chybisov (Lugansk Regional Oncology Center, Lugansk), Y. Hotko (Uzhgorod Cancer Hospital, Uzhgorod), O. Kolesnik (Academy of Medical Science, Kiev), V. Komissarenko (Krivoy Rog City Oncology Centre, Krivoy Rog), I. Kostinskyy (Ivano-Frankivsk State Medical Academy, Ivano-Frankivsk), A. Kovalev (Zaporozhye Regional Oncology Center, Zaporozhye), V. Paramonov (Cherkassy Oblasnoy Onkodispenser, Charkassy), I. Shchepotin (National Medical University, Kiev), Y.

Shparyk (Lviv Oncological Medical and Diagnostical Center, Lviv), S. Zolotukhin (Donetsk Regional Oncology Center, Donetsk); *United Kingdom*, J. Cassidy (Beatson Oncology Centre, Glasgow), P. Corrie (Addenbrooke's NHS Trust, Cambridge), D. Cunningham (The Royal Marsden Hospital, Sutton and London), S. Essapen and C. Topham (St Lukes Cancer Centre, Guildford), S. Gollins (North Wales Cancer Treatment Centre, Rhyl), M. Hill (Kent Oncology Centre, Maidstone), K. McAdam (Peterborough District Hospital, Peterborough), A. Thomas (Leicester Royal Infirmary, Leicester), H. Wasan (Hammersmith Hospital, London), A. Webb (Royal Sussex County Hospital, Brighton).
